# Supplementary material for: Supported ionic liquid [Bmim]FeCl4/Am TiO2 as an efficient catalyst for the catalytic oxidative desulfurization of fuels
Source: Royal Society of Chemistry journal article supplement (doi:10.1039/c5ra00999e), 2015-01-01
Supplement: c5ra00999e1.pdf [file c5ra00999e1.pdf]

## Supporting Information

### Supported ionic liquid [Bmim]FeCl<sub>4</sub>/Am TiO<sub>2</sub> as an efficient catalyst for catalytic oxidative desulfurization of fuels

Suhang Xun<sup>a</sup>, Wenshuai Zhu<sup>a,\*</sup>, Dan Zheng<sup>a</sup>, Hongping Li<sup>a</sup>, Wei Jiang<sup>b</sup>, Ming Zhang<sup>b</sup>, Yuejiao Qin<sup>a</sup>, Zhen Zhao<sup>c</sup>, Huaming Li<sup>b,\*</sup>

<sup>a</sup> *School of Chemistry and Chemical Engineering, Jiangsu University, Zhenjiang, 212013, P. R. China*

<sup>b</sup> *Institute for Energy Research, Jiangsu University, Zhenjiang, 212013, P. R. China*

<sup>c</sup> *State Key Laboratory of Heavy Oil Processing, Faculty of Science, China University of Petroleum, Beijing, 102249, P. R. China*

**\*Corresponding author:** Tel.: +86-511-88791800; Fax: +86-511-88791708;

E-mail address: zhuws@ujs.edu.cn (W. S. Zhu), lhm@ujs.edu.cn (H. M. Li)

**Table S1** Different heterogeneous catalytic system parameters on the removal of DBT

| Entry | Catalyst                                                                                                                                        | Reaction conditions |        |                                        | Sulfur removal / % | Recycle Times | Ref.      |
|-------|-------------------------------------------------------------------------------------------------------------------------------------------------|---------------------|--------|----------------------------------------|--------------------|---------------|-----------|
|       |                                                                                                                                                 | t / min             | T / °C | n(H <sub>2</sub> O <sub>2</sub> / DBT) |                    |               |           |
| 1     | HPW/SiO <sub>2</sub> -EISA                                                                                                                      | 120                 | 60     | 12                                     | 99.6               | 7             | 1         |
| 2     | SiO <sub>2</sub> -TiO <sub>2</sub> xerogel                                                                                                      | 180                 | 80     | 15                                     | 96                 | 3             | 2         |
| 3     | [pmim]FeCl <sub>4</sub> -MCM-41                                                                                                                 | 60                  | 30     | 5                                      | 91.6               | 4             | 3         |
| 4     | Mesoporous HPMo/SiO <sub>2</sub>                                                                                                                | 60                  | 70     | 0.05 mL                                | 100                | 4             | 4         |
| 5     | [Bmim]PW/HMS                                                                                                                                    | 60                  | 60     | 3                                      | 98                 | 3             | 5         |
| 6     | [(C <sub>6</sub> H <sub>13</sub> ) <sub>3</sub> PC <sub>14</sub> H <sub>29</sub> ] <sub>2</sub> W <sub>6</sub> O <sub>19</sub> /G- <i>h</i> -BN | 80                  | 30     | 4                                      | 99.3               | 5             | 6         |
| 7     | HPW-PDMAEMA-SiO <sub>2</sub>                                                                                                                    | 150                 | 70     | 12                                     | 100                | 6             | 7         |
| 8     | HPW-CeO <sub>2</sub>                                                                                                                            | 30                  | 30     | 6                                      | 99.4               | 10            | 8         |
| 9     | PSMIMHSO <sub>4</sub> /UIO-66                                                                                                                   | 30                  | 20     | 7                                      | 94.6 <sup>a</sup>  | 6             | 9         |
| 10    | WO <sub>3</sub> /ZrO <sub>2</sub> -700                                                                                                          | 60                  | 70     | 15                                     | 86 <sup>a</sup>    | 4             | 10        |
| 11    | [pmim]FeCl <sub>4</sub> -SBA-15                                                                                                                 | 90                  | 30     | 5                                      | 94.3               | -             | 11        |
| 12    | [(C <sub>4</sub> H <sub>9</sub> ) <sub>4</sub> N] <sub>6</sub> Mo <sub>7</sub> O <sub>24</sub>                                                  | 90                  | 50     | 5                                      | 99                 | 6             | 12        |
| 13    | [C <sub>16</sub> mim] <sub>2</sub> Mo <sub>2</sub> O <sub>11</sub>                                                                              | 60                  | 50     | 6                                      | 98.4               | 6             | 13        |
| 14    | HPW-TUD-1                                                                                                                                       | 120                 | 60     | 8                                      | 98.1               | 3             | 14        |
| 15    | [Bmim]FeCl <sub>4</sub> /Am TiO <sub>2</sub>                                                                                                    | 60                  | 60     | 4                                      | 99.6               | 25            | This work |

a: the removal of BT

- 1 J. H. Lei, L. N. Chen, P. Yang, X. D. Du and X. M. Yan, *J. Porous Mater.*, 2013, **20**, 1379-1385.
- 2 S. T. Yang, K. E. Jeong, S. Y. Jeong and W. S. Ahn, *Mater. Res. Bull.*, 2012, **47**, 4398-4402.
- 3 J. Xiong, W. S. Zhu, H. M. Li, Y. H. Xu, W. Jiang, S. H. Xun, H. Liu and Z. Zhao, *AIChE J.*, 2013, **59**, 4696-4704.
- 4 J. H. Qiu, G. H. Wang, Y. Q. Zhang, D. L. Zeng and Y. Chen, *Fuel*, 2015, **147**, 195-202.
- 5 L. Tang, G. Q. Luo, L. H. Kang, M. Y. Zhu and B. Dai, *Korean J. Chem. Eng.*, 2013, **30**, 314-320.
- 6 W. S. Zhu, B. L. Dai, P. W. Wu, Y. H. Chao, J. Xiong, S. H. Xun, H. P. Li and H. M. Li, *ACS Sustainable Chem. Eng.*, 2015, **3**, 186-194.
- 7 M. Y. Zhu, G. Q. Luo, L. H. Kang and B. Dai, *RSC Adv.*, 2014, **4**, 16769-16776.

- 8 M. Zhang, W. S. Zhu, S. H. Xun, H. M. Li, Q. Q. Gu, Z. Zhao and Q. Wang, *Chem. Eng. J.*, 2013, **220**, 328-336.
- 9 J. X. Wu, Y. L. Gao, W. Zhang, Y. Y. Tan, A. M. Tang, Y. Men and B. H. J. Tang, *Appl. Organomet. Chem.*, 2015, **29**, 96-100.
- 10 Z. Hasan, J. Jeon and S. H. Jung, *J. Hazard. Mater.*, 2012, **205**, 216-221.
- 11 W. J. Ding, W. S. Zhu, J. Xiong, L. Yang, A. M. Wei, M. Zhang and H. M. Li, *Chem. Eng. J.*, 2015, **266**, 213-221.
- 12 H. Y. Lü, C. L. Deng, W. Z. Ren and X. Yang, *Fuel Process. Technol.*, 2014, **119**, 87-91.
- 13 W. S. Zhu, P. W. Wu, Y. H. Chao, H. M. Li, F. Zou, S. H. Xun, F. X. Zhu and Z. Zhao, *Ind. Eng. Chem. Res.*, 2013, **52**, 17399-17406.
- 14 L. Tang, G. Q. Luo, M. Y. Zhu, L. H. Kang and B. Dai, *J. Ind. Eng. Chem.*, 2013, **19**, 620-626.
